# Supplementary material
Source: PubMed Central journal article supplement (PMC3837793)
Supplement: AEM.03134-13_zam999104961so1.pdf [file AEM.03134-13_zam999104961so1.pdf]

TABLE S1. Bacterial strains and plasmids used in this study

| Strain or plasmid            | Relevant characteristic(s)                                                            | Source or reference       |
|------------------------------|---------------------------------------------------------------------------------------|---------------------------|
| Strains                      |                                                                                       |                           |
| <i>E. coli</i>               |                                                                                       |                           |
| TOP10                        | <i>recA1 endA1 gyrA96 thi-1 hsdR17</i> ( $r_K^- m_K^+$ ) <i>supE44 relA1 ΔlacU169</i> | Invitrogen, Carlsbad, CA  |
| <i>G. metallireducens</i>    |                                                                                       |                           |
| wild type (DSM 7210)         | wild type                                                                             | Lovley and Lonergan, 1990 |
| ppsA                         | <i>ΔppsA ::Sp<sup>r</sup></i>                                                         | This work                 |
| ppcB                         | <i>ΔppcB ::Sp<sup>r</sup></i>                                                         | This work                 |
| <i>G. sulfurreducens</i>     |                                                                                       |                           |
| PCA (ATCC51573)              | wild type                                                                             | Caccavo et al, 1994       |
| Plasmids                     |                                                                                       |                           |
| pCR2.1-TOPO                  | PCR cloning vector; Ap <sup>r</sup> , Km <sup>r</sup>                                 | Invitrogen, Carlsbad, CA  |
| pRG5                         | Broad-host range <i>taclac</i> expression vector; Sp <sup>r</sup>                     | Kim <i>et al.</i> , 2005  |
| pCM66                        | Broad-host range <i>lac</i> expression vector; Km <sup>r</sup>                        | Marx and Lidstrom, 2001   |
| pCR2.1ppsAup5'+3'dn          | pCR2.1TOPO carrying <i>ppsAup5'+3'dn</i> ; Ap <sup>r</sup> , Km <sup>r</sup>          | This work                 |
| pCR2.1ΔppsA::Sp <sup>r</sup> | pCR2.1TOPO carrying <i>ΔppsA::Sp<sup>r</sup></i> ; Ap <sup>r</sup> , Km <sup>r</sup>  | This work                 |
| pCR2.1ppcBup5'+3'dn          | pCR2.1TOPO carrying <i>ppcBup5'+3'dn</i> ; Ap <sup>r</sup> , Km <sup>r</sup>          | This work                 |
| pCR2.1ΔppcB::Sp <sup>r</sup> | pCR2.1TOPO carrying <i>ΔppcB::Sp<sup>r</sup></i> ; Ap <sup>r</sup> , Km <sup>r</sup>  | This work                 |
| pCM66ppsA                    | pCM66 carrying <i>ppsA</i> ; Km <sup>r</sup>                                          | This work                 |
| pCM66ppcB                    | pCM66 carrying <i>ppcB</i> ; Km <sup>r</sup>                                          | This work                 |

## References

- Caccavo, F., Jr, Lonergan, D.J., Lovley, D.R., Davis, M., Stolz, J.F., and McInerney, M.J. (1994) *Geobacter sulfurreducens* sp. nov., a hydrogen- and acetate-oxidizing dissimilatory metal-reducing microorganism. *Appl Environ Microbiol* **60**: 3752-3759.
- Kim, B.C., Leang, C., Ding, Y.H., Glaven, R.H., Coppi, M.V., and Lovley, D.R. (2005) OmcF, a putative *c*-type monoheme outer membrane cytochrome required for the expression of other outer membrane cytochromes in *Geobacter sulfurreducens*. *J Bacteriol* **187**: 4505-4513.
- Marx, C. J., and Lidstrom, M. E. (2001) Development of improved versatile broad-host-range vectors for use in methylotrophs and other Gram-negative bacteria. *Microbiology* **147**: 2065-2075.
- Lovley D.R., and Lonergan, D.J. (1990) Anaerobic oxidation of toluene, phenol, and p-cresol by the dissimilatory iron-reducing organism, GS-15. *Appl Environ Microbiol* **56**: 1858-64.

TABLE S2. Primers used for RT-qPCR and mutants construction

| Primer name    | Purpose                                  | Location         | Sequence (5' to 3')                    |
|----------------|------------------------------------------|------------------|----------------------------------------|
| 2143_46F       | qRT-PCR <i>bamY</i>                      | Sense strand     | TACTTCATCGACCGCAACAT                   |
| 2143_226R      |                                          | Antisense strand | AGACCTCCGTATCCAGCAGA                   |
| 1539_1490F     | qRT-PCR <i>bssA</i>                      | Sense strand     | GCAGGCGTAAGACCCATAAG                   |
| 1539_1595R     |                                          | Antisense strand | CCCGAATAGGACCAGTCAAA                   |
| 2100_475F      | qRT-PCR <i>ppsA</i>                      | Sense strand     | AGCGTGGTCACTGAAGGAAT                   |
| 2100_613R      |                                          | Antisense strand | AAAAGACGTAGGCGGCATAG                   |
| 0899_139F      | qRT-PCR <i>proC</i>                      | Sense strand     | CGGGAGACCTACGGTATTGA                   |
| 0899_293R      |                                          | Antisense strand | ATGATGGAGATGACGAGCTTC                  |
| ppsAupBHI      | PCR of <i>ppsA</i> 5' flanking region    | Sense strand     | CTCGGATCCGTCAGATGAACCAGT<br>TTCGTACCA  |
| ppsAupAvrII    |                                          | Antisense strand | TGACCTAGGCATCGCGTGTCTCCCG<br>AATGTACG  |
| ppsAdnAvrII    | PCR of <i>ppsA</i> 3' flanking region    | Sense strand     | TCACCTAGGTGAGAAAACCGGACA<br>GAGGAGGCA  |
| ppsAdnNXbaI    |                                          | Antisense strand | AAGTCTAGAAAAGCTCGCGCCGGGC<br>AGGTCCT   |
| ACDL1          | PCR of <i>ppcB</i> 5' flanking region    | Sense strand     | AGCCCGCAGATCTATAGCCTACCG<br>GATCAACCAG |
| ACDL2          |                                          | Antisense strand | ATCAGGCCTAGGCATACTGCCTCCT<br>TATCTGTTG |
| ACDL3          | PCR of <i>ppcB</i> 3' flanking region    | Sense strand     | AAGATGCCTAGGCGAGATGATCCC<br>GCGTCTCAC  |
| ACDL4          |                                          | Antisense strand | AGTATTCAGATCTCGTATGGTGAT<br>GGTGATGTCG |
| ACDL5          | PCR of spectinomycin resistance cassette | Sense strand     | ACCATACCTAGGATTCGAGCT<br>CGGTACCCG     |
| ACDL6          |                                          | Antisense strand | ACCATACCTAGGGACCATGATTAC<br>AAGCTTGC   |
| ppsAComBHIUP   | PCR of <i>ppsA</i> for complementation   | Sense strand     | CCTGGATCCCGTACATTCGGGAGA<br>CACGCGATG  |
| ppsAComSacIDN  |                                          | Antisense strand | GACGAGCTCTGCCTCCTCTGTCCGG<br>TTTTCTCA  |
| ppcBComXbaIIUP | PCR of <i>ppcB</i> for complementation   | Sense strand     | GGTTCTAGACCAACAGATAAGGAG<br>GCAGTATG   |
| ppcBComSacIDN  |                                          | Antisense strand | CACGAGCTCAGGGAGTGCTTGGAT<br>GTCCTA     |
